# Supplementary material for: NAC Transcription Factors ATAF1 and ANAC055 Negatively Regulate Thermomemory in Arabidopsis
Source: Research Square preprint supplement (doi:10.21203/rs.3.rs-514892/v1), 2021-05-17
Supplement: Supplementary file 2 [file cbaf1fcc79cee63e5237375e.xlsx]

## Sheet: node.module
Supplementary Table S5. Shared co-expressed targets of ATAF1 and ANAC055 in response to HS.
ID	gs	ModuleNo	ATAF1	NAC55
AT1G06910	TRFL7	0	1	1
AT1G12390		0	1	1
AT1G20480	4CLL2	0	1	1
AT1G34020		0	1	1
AT1G48870		0	1	1
AT1G50120		0	1	1
AT1G53700	WAG1	0	1	1
AT1G54940	GUX4	0	1	1
AT1G71865		0	1	1
AT1G73720	SMU1	0	1	1
AT1G74660	MIF1	0	1	1
AT2G01990		0	1	1
AT2G24592		0	1	1
AT2G45590		0	1	1
AT2G46760	GULLO6	0	1	1
AT3G20640	BHLH123	0	1	1
AT3G21230	4CL4	0	1	1
AT3G53390		0	1	1
AT3G63290		0	1	1
AT4G02485		0	1	1
AT4G14480	BLUS1	0	1	1
AT4G22000		0	1	1
AT4G26550		0	1	1
AT4G28350	LECRK72	0	1	1
AT4G34750		0	1	1
AT5G02970		0	1	1
AT5G10320		0	1	1
AT5G15190		0	1	1
AT5G19100		0	1	1
AT5G20500	GRXC4	0	1	1
AT5G23850		0	1	1
AT5G38940		0	1	1
AT5G50450		0	1	1
AT5G54920		0	1	1
AT5G57980	NRPB5L1	0	1	1
AT5G58530		0	1	1
AT5G63590	FLS3	0	1	1
AT1G04100	IAA10	0	1	0
AT1G05350		0	1	0
AT1G12244		0	1	0
AT1G24350		0	1	0
AT1G43770		0	1	0
AT1G56670	LIP4	0	1	0
AT1G64380	ERF061	0	1	0
AT1G71230	CSN5A	0	1	0
AT1G76980		0	1	0
AT1G80800		0	1	0
AT2G01490	PAHX	0	1	0
AT2G01640		0	1	0
AT2G03050	EMB93	0	1	0
AT2G14960	GH3.1	0	1	0
AT2G17700		0	1	0
AT2G25940	ALPHA-VPE	0	1	0
AT2G30080	ZIP6	0	1	0
AT2G34570	MEE21	0	1	0
AT2G35910	ATL70	0	1	0
AT2G41150		0	1	0
AT3G01990	ACR6	0	1	0
AT3G03380	DEGP7	0	1	0
AT3G10970		0	1	0
AT3G13810	IDD11	0	1	0
AT3G23255		0	1	0
AT3G44540	FAR4	0	1	0
AT3G47965		0	1	0
AT3G48185		0	1	0
AT3G50800		0	1	0
AT3G56440	ATG18D	0	1	0
AT3G56730		0	1	0
AT3G56830		0	1	0
AT3G57670	WIP2	0	1	0
AT3G62620		0	1	0
AT3G63445		0	1	0
AT4G14965	MAPR4	0	1	0
AT4G17960		0	1	0
AT4G28070		0	1	0
AT4G28690		0	1	0
AT4G31750	WIN2	0	1	0
AT4G32140		0	1	0
AT5G01700		0	1	0
AT5G10720	AHK5	0	1	0
AT5G19410	ABCG23	0	1	0
AT5G25110	CIPK25	0	1	0
AT5G35777		0	1	0
AT5G47100	CBL9	0	1	0
AT5G54190	PORA	0	1	0
AT5G54850		0	1	0
AT5G59900		0	1	0
AT1G05150		0	0	1
AT1G10750		0	0	1
AT1G15960	NRAMP6	0	0	1
AT1G16790		0	0	1
AT1G66470	BHLH83	0	0	1
AT2G20650		0	0	1
AT2G42670	PCO4	0	0	1
AT3G07410	RABA5B	0	0	1
AT3G13730	CYP90D1	0	0	1
AT3G17185	TASIR-ARF	0	0	1
AT3G53880	AKR4C11	0	0	1
AT3G59810	LSM6A	0	0	1
AT4G11640	SR	0	0	1
AT4G16750	ERF039	0	0	1
AT4G16770		0	0	1
AT4G30680		0	0	1
AT4G32860		0	0	1
AT1G01730		0	0	0
AT1G01760		0	0	0
AT1G04000		0	0	0
AT1G05090		0	0	0
AT1G06510		0	0	0
AT1G07745	RAD51D	0	0	0
AT1G08940		0	0	0
AT1G11270		0	0	0
AT1G11900		0	0	0
AT1G12880	NUDT12	0	0	0
AT1G15165		0	0	0
AT1G16445		0	0	0
AT1G16850		0	0	0
AT1G16916		0	0	0
AT1G17455	EFL4	0	0	0
AT1G19080	TTN10	0	0	0
AT1G22180		0	0	0
AT1G22350		0	0	0
AT1G22370	UGT85A5	0	0	0
AT1G26940	CYP23	0	0	0
AT1G27440	IRX10	0	0	0
AT1G27920	MAP65-8	0	0	0
AT1G30890		0	0	0
AT1G32410		0	0	0
AT1G32930	B3GALT6	0	0	0
AT1G33811		0	0	0
AT1G34315		0	0	0
AT1G43020		0	0	0
AT1G48550		0	0	0
AT1G52155		0	0	0
AT1G52630		0	0	0
AT1G52825		0	0	0
AT1G56320		0	0	0
AT1G59218	RF9	0	0	0
AT1G61770	C50	0	0	0
AT1G62680		0	0	0
AT1G63530		0	0	0
AT1G64690	BLT	0	0	0
AT1G67410		0	0	0
AT1G67880		0	0	0
AT1G68230	RTNLB14	0	0	0
AT1G68650		0	0	0
AT1G68725	AGP19	0	0	0
AT1G69170	SPL6	0	0	0
AT1G69290		0	0	0
AT1G71310		0	0	0
AT1G73210		0	0	0
AT1G77350		0	0	0
AT1G77890		0	0	0
AT1G78910		0	0	0
AT1G79630		0	0	0
AT1G80950	LPEAT1	0	0	0
AT2G01630		0	0	0
AT2G02860	SUC3	0	0	0
AT2G04430	NUDT5	0	0	0
AT2G04560	LPXB	0	0	0
AT2G07734		0	0	0
AT2G14530	TBL13	0	0	0
AT2G14835		0	0	0
AT2G16630		0	0	0
AT2G17020	FBL10	0	0	0
AT2G17260	GLR2	0	0	0
AT2G19490		0	0	0
AT2G20370	KAM1	0	0	0
AT2G22260	ALKBH2	0	0	0
AT2G22370	MED18	0	0	0
AT2G22490	CYCD2-1	0	0	0
AT2G23370		0	0	0
AT2G25570		0	0	0
AT2G31140		0	0	0
AT2G31300	ARPC1B	0	0	0
AT2G31710		0	0	0
AT2G33550		0	0	0
AT2G34520	RPS14	0	0	0
AT2G37090	IRX9	0	0	0
AT2G38130	MAK3	0	0	0
AT2G38680		0	0	0
AT2G38880	NFYB1	0	0	0
AT2G39690		0	0	0
AT2G41770		0	0	0
AT2G42290		0	0	0
AT2G42485		0	0	0
AT2G44525		0	0	0
AT2G46700	CRK3	0	0	0
AT3G02030		0	0	0
AT3G03220	EXPA13	0	0	0
AT3G04450		0	0	0
AT3G04850	TCX4	0	0	0
AT3G05430		0	0	0
AT3G05600		0	0	0
AT3G05710	SYP43	0	0	0
AT3G07020	UGT80A2	0	0	0
AT3G09360		0	0	0
AT3G09735	S1FA3	0	0	0
AT3G10210		0	0	0
AT3G10680		0	0	0
AT3G12040	MAG	0	0	0
AT3G12210		0	0	0
AT3G13050	2017-10-07	0	0	0
AT3G13620		0	0	0
AT3G14430		0	0	0
AT3G14690	CYP72A15	0	0	0
AT3G17070	PER29	0	0	0
AT3G17380		0	0	0
AT3G17590	BSH	0	0	0
AT3G20040	ATHXK4	0	0	0
AT3G23100	XRCC4	0	0	0
AT3G24255		0	0	0
AT3G25070	RIN4	0	0	0
AT3G26360		0	0	0
AT3G29130		0	0	0
AT3G47360	HSD3	0	0	0
AT3G49100	SRP9	0	0	0
AT3G51030	TRX1	0	0	0
AT3G51610		0	0	0
AT3G52460		0	0	0
AT3G55000	TON1A	0	0	0
AT3G55140		0	0	0
AT3G55940	PLC7	0	0	0
AT3G59390		0	0	0
AT3G59870		0	0	0
AT3G62880	OEP164	0	0	0
AT4G00420		0	0	0
AT4G02830		0	0	0
AT4G03935		0	0	0
AT4G04200		0	0	0
AT4G10420		0	0	0
AT4G15020		0	0	0
AT4G15840		0	0	0
AT4G17720		0	0	0
AT4G18460		0	0	0
AT4G21720		0	0	0
AT4G22160		0	0	0
AT4G22260	AOX4	0	0	0
AT4G26100	CK1	0	0	0
AT4G26470	CML21	0	0	0
AT4G26620		0	0	0
AT4G27480		0	0	0
AT4G27730	OPT6	0	0	0
AT4G29230	anac075	0	0	0
AT4G29890		0	0	0
AT4G31460		0	0	0
AT4G32295		0	0	0
AT4G35720		0	0	0
AT4G35905		0	0	0
AT4G35980		0	0	0
AT4G36470		0	0	0
AT4G37900	GRDP2	0	0	0
AT4G38640		0	0	0
AT4G40050		0	0	0
AT5G02060		0	0	0
AT5G03050		0	0	0
AT5G03406		0	0	0
AT5G04270	PAT15	0	0	0
AT5G04710		0	0	0
AT5G05310		0	0	0
AT5G07140		0	0	0
AT5G09980	PEP4	0	0	0
AT5G11020		0	0	0
AT5G11040	TRS120	0	0	0
AT5G11640		0	0	0
AT5G12330	LRP1	0	0	0
AT5G13910	LEP	0	0	0
AT5G14480		0	0	0
AT5G15265		0	0	0
AT5G17370		0	0	0
AT5G17440		0	0	0
AT5G19350	RBP47B'	0	0	0
AT5G19930		0	0	0
AT5G19950		0	0	0
AT5G22400	ROPGAP1	0	0	0
AT5G22794		0	0	0
AT5G23460		0	0	0
AT5G23810	AAP7	0	0	0
AT5G24310	ABIL3	0	0	0
AT5G27490		0	0	0
AT5G40020		0	0	0
AT5G40080		0	0	0
AT5G43140		0	0	0
AT5G45010	ATDSS1(V)	0	0	0
AT5G45370		0	0	0
AT5G46870		0	0	0
AT5G47520	RABA5A	0	0	0
AT5G51160		0	0	0
AT5G51510		0	0	0
AT5G57970		0	0	0
AT5G59430	TRP1	0	0	0
AT5G60050		0	0	0
AT5G62500	EB1B	0	0	0
AT5G62960		0	0	0
AT5G63440		0	0	0
AT5G65250		0	0	0
AT5G65940	CHY1	0	0	0
ATCG00240	TRNY	0	0	0
ATCG00890	NDHB.1	0	0	0
ATMG01190	ATP1	0	0	0
AT1G01360	PYL9	1	1	1
AT1G01510	AN	1	1	1
AT1G01690	ATPRD3	1	1	1
AT1G02065	SPL8	1	1	1
AT1G02090	CSN7	1	1	1
AT1G02260		1	1	1
AT1G02340	HFR1	1	1	1
AT1G02380		1	1	1
AT1G02400	GA2OX6	1	1	1
AT1G02810	PME7	1	1	1
AT1G02816		1	1	1
AT1G03070		1	1	1
AT1G03365	RF4	1	1	1
AT1G03840	MGP	1	1	1
AT1G04130	TPR2	1	1	1
AT1G04520	CRRSP3	1	1	1
AT1G04730	CTF18	1	1	1
AT1G04990		1	1	1
AT1G05300	ZIP5	1	1	1
AT1G06430	FTSH8	1	1	1
AT1G07210		1	1	1
AT1G07560		1	1	1
AT1G07728		1	1	1
AT1G09390		1	1	1
AT1G09530	PIF3	1	1	1
AT1G09750		1	1	1
AT1G10060	BCAT1	1	1	1
AT1G10130	ECA3	1	1	1
AT1G10170	NFXL1	1	1	1
AT1G10230	ASK18	1	1	1
AT1G10500	ISCA	1	1	1
AT1G12230		1	1	1
AT1G12380		1	1	1
AT1G13250	GATL3	1	1	1
AT1G13710	CYP78A5	1	1	1
AT1G13810		1	1	1
AT1G14130		1	1	1
AT1G15860		1	1	1
AT1G16330	CYCB3;1	1	1	1
AT1G16890	UBC36	1	1	1
AT1G17370	UBP1B	1	1	1
AT1G18090		1	1	1
AT1G18210	CML27	1	1	1
AT1G18550		1	1	1
AT1G19010		1	1	1
AT1G19350	BZR2	1	1	1
AT1G19360		1	1	1
AT1G19800	TGD1	1	1	1
AT1G19880		1	1	1
AT1G20350	TIM17-1	1	1	1
AT1G20850	XCP2	1	1	1
AT1G21000		1	1	1
AT1G21010		1	1	1
AT1G21070		1	1	1
AT1G21130		1	1	1
AT1G21350		1	1	1
AT1G22640	MYB3	1	1	1
AT1G24706	THO2	1	1	1
AT1G25370		1	1	1
AT1G25390		1	1	1
AT1G25530		1	1	1
AT1G26570	UGD1	1	1	1
AT1G26600	CLE9	1	1	1
AT1G26640		1	1	1
AT1G26900	PCMP-E54	1	1	1
AT1G27000		1	1	1
AT1G27285		1	1	1
AT1G27320	AHK3	1	1	1
AT1G27760	SAT32	1	1	1
AT1G27840	ATCSA-1	1	1	1
AT1G27930		1	1	1
AT1G29090		1	1	1
AT1G30090		1	1	1
AT1G30330	ARF6	1	1	1
AT1G30410	ATMRP13	1	1	1
AT1G30490	ATHB-9	1	1	1
AT1G30825	ARPC2A	1	1	1
AT1G30910		1	1	1
AT1G31070	GLCNAC1PUT1	1	1	1
AT1G31130		1	1	1
AT1G31480	SGR2	1	1	1
AT1G32415	PCMP-E56	1	1	1
AT1G32450	NPF7.3	1	1	1
AT1G33440	NPF4.4	1	1	1
AT1G35660		1	1	1
AT1G35780		1	1	1
AT1G41830	SKS6	1	1	1
AT1G42550	PMI1	1	1	1
AT1G43130	LCV2	1	1	1
AT1G44100	AAP5	1	1	1
AT1G44835		1	1	1
AT1G47290	3BETAHSD/D1	1	1	1
AT1G49350		1	1	1
AT1G49670	NQR	1	1	1
AT1G49740		1	1	1
AT1G49970	CLPR1	1	1	1
AT1G50370	FYPP1	1	1	1
AT1G50640	ERF3	1	1	1
AT1G51470	TGG5	1	1	1
AT1G51860		1	1	1
AT1G51890		1	1	1
AT1G52560	HSP26.5	1	1	1
AT1G52690		1	1	1
AT1G52780		1	1	1
AT1G53300	TTL1	1	1	1
AT1G53560		1	1	1
AT1G53830	PME2	1	1	1
AT1G54570		1	1	1
AT1G55120	CWINV3	1	1	1
AT1G55130	TMN6	1	1	1
AT1G55280		1	1	1
AT1G55760		1	1	1
AT1G55880		1	1	1
AT1G56020		1	1	1
AT1G56110	NOP56	1	1	1
AT1G56300		1	1	1
AT1G56520		1	1	1
AT1G56630		1	1	1
AT1G56690	PCMP-H69	1	1	1
AT1G57620	CYB	1	1	1
AT1G57870	ASK4	1	1	1
AT1G58340	ZF14	1	1	1
AT1G58470	RBP1	1	1	1
AT1G58602		1	1	1
AT1G59980	ATJ39	1	1	1
AT1G60460		1	1	1
AT1G60680	AGD2	1	1	1
AT1G60890	PIP5K8	1	1	1
AT1G62300	WRKY6	1	1	1
AT1G62810		1	1	1
AT1G62870		1	1	1
AT1G64200	VHA-E3	1	1	1
AT1G64390	AtGH9C2	1	1	1
AT1G64740	TUBA1	1	1	1
AT1G65040	HRD1B	1	1	1
AT1G65420	NPQ7	1	1	1
AT1G66230	MYB20	1	1	1
AT1G66250		1	1	1
AT1G67420		1	1	1
AT1G68400		1	1	1
AT1G68540	TKPR2	1	1	1
AT1G69030		1	1	1
AT1G69220	SIK1	1	1	1
AT1G69260	AFP1	1	1	1
AT1G69295	PDCB4	1	1	1
AT1G69450		1	1	1
AT1G69480	PHO1-H10	1	1	1
AT1G69570	CDF5	1	1	1
AT1G69870	NPF2.13	1	1	1
AT1G70200		1	1	1
AT1G71240		1	1	1
AT1G71695	PER12	1	1	1
AT1G72530	MORF7	1	1	1
AT1G72700	ALA5	1	1	1
AT1G72770	HAB1	1	1	1
AT1G73480		1	1	1
AT1G73590	PIN1	1	1	1
AT1G73670	MPK15	1	1	1
AT1G73680	DOX2	1	1	1
AT1G73750		1	1	1
AT1G73760		1	1	1
AT1G75180		1	1	1
AT1G75410	BLH3	1	1	1
AT1G75550		1	1	1
AT1G75820	CLV1	1	1	1
AT1G76060	EMB1793	1	1	1
AT1G76080	CDSP32	1	1	1
AT1G76100	PETE	1	1	1
AT1G76520		1	1	1
AT1G76860	LSM3B	1	1	1
AT1G77000	SKP2B	1	1	1
AT1G77720	PPK1	1	1	1
AT1G78040		1	1	1
AT1G78820		1	1	1
AT1G79820	SGB1	1	1	1
AT1G80150		1	1	1
AT1G80490	TPR1	1	1	1
AT2G01480		1	1	1
AT2G01610		1	1	1
AT2G01660	CRRSP12	1	1	1
AT2G01880	PAP7	1	1	1
AT2G02120	PDF2.1	1	1	1
AT2G02230	PP2B1	1	1	1
AT2G02400		1	1	1
AT2G02810	UTR1	1	1	1
AT2G03590	UPS1	1	1	1
AT2G03760	SOT12	1	1	1
AT2G04160	AIR3	1	1	1
AT2G04520		1	1	1
AT2G04570		1	1	1
AT2G07806		1	1	1
AT2G07811		1	1	1
AT2G15128		1	1	1
AT2G15240		1	1	1
AT2G15280	RTNLB10	1	1	1
AT2G17280	PGM	1	1	1
AT2G18250	COAD	1	1	1
AT2G18330		1	1	1
AT2G18500	OFP7	1	1	1
AT2G19570	CDA1	1	1	1
AT2G19830	VPS32.1	1	1	1
AT2G19900	NADP-ME1	1	1	1
AT2G20280		1	1	1
AT2G21560		1	1	1
AT2G21790	RNR1	1	1	1
AT2G22720		1	1	1
AT2G22910	NAGS1	1	1	1
AT2G23410	DPS	1	1	1
AT2G23790		1	1	1
AT2G23910		1	1	1
AT2G24180	CYP71B6	1	1	1
AT2G24260	BHLH66	1	1	1
AT2G24580		1	1	1
AT2G25320		1	1	1
AT2G25650		1	1	1
AT2G25730		1	1	1
AT2G25950		1	1	1
AT2G26250	FDH	1	1	1
AT2G26560	PLP2	1	1	1
AT2G26670	HO1	1	1	1
AT2G26680		1	1	1
AT2G26690	NPF6.2	1	1	1
AT2G27170	SMC3	1	1	1
AT2G27600	SKD1	1	1	1
AT2G28160	FIT	1	1	1
AT2G28260	CNGC15	1	1	1
AT2G29670		1	1	1
AT2G30480		1	1	1
AT2G30840		1	1	1
AT2G31360	ADS2	1	1	1
AT2G31400	GUN1	1	1	1
AT2G31570	GPX2	1	1	1
AT2G32260	CCT1	1	1	1
AT2G32430	B3GALT3	1	1	1
AT2G32530	CSLB3	1	1	1
AT2G32540	CSLB4	1	1	1
AT2G32950	COP1	1	1	1
AT2G32960		1	1	1
AT2G33340	PRP19B	1	1	1
AT2G33450	RPL28	1	1	1
AT2G33570		1	1	1
AT2G33770	UBC24	1	1	1
AT2G34410		1	1	1
AT2G34560		1	1	1
AT2G34590	E1-BETA-2	1	1	1
AT2G34840		1	1	1
AT2G34920	EDA18	1	1	1
AT2G35320	ATEYA	1	1	1
AT2G35620	FEI2	1	1	1
AT2G36080	ARF31	1	1	1
AT2G36090		1	1	1
AT2G36200		1	1	1
AT2G36430		1	1	1
AT2G36895		1	1	1
AT2G37060	NFYB8	1	1	1
AT2G37080	ICR2	1	1	1
AT2G37420		1	1	1
AT2G37585		1	1	1
AT2G37640	EXPA3	1	1	1
AT2G37790	AKR4C10	1	1	1
AT2G38110	GPAT6	1	1	1
AT2G38340	DREB2E	1	1	1
AT2G38410		1	1	1
AT2G38860	DJ1E	1	1	1
AT2G39020		1	1	1
AT2G39350	ABCG1	1	1	1
AT2G39550	GGB	1	1	1
AT2G39700	EXPA4	1	1	1
AT2G40820	SCAB2	1	1	1
AT2G41160		1	1	1
AT2G41480	PER25	1	1	1
AT2G41740	VLN2	1	1	1
AT2G42520	RH37	1	1	1
AT2G42900		1	1	1
AT2G43140	BHLH129	1	1	1
AT2G43570	CHI	1	1	1
AT2G44530	PRS5	1	1	1
AT2G44970		1	1	1
AT2G45190	YAB1	1	1	1
AT2G46170	RTNLB5	1	1	1
AT2G46370	JAR1	1	1	1
AT2G46680	ATHB-7	1	1	1
AT2G46810	BHLH70	1	1	1
AT2G47200		1	1	1
AT2G47240	LACS1	1	1	1
AT2G47260	WRKY23	1	1	1
AT2G47550	PME20	1	1	1
AT2G47580	U1A	1	1	1
AT2G47630		1	1	1
AT2G47790		1	1	1
AT2G48060		1	1	1
AT3G01050	MUB1	1	1	1
AT3G01090	KIN10	1	1	1
AT3G01190	PER27	1	1	1
AT3G01650	RGLG1	1	1	1
AT3G01820		1	1	1
AT3G02550	LBD41	1	1	1
AT3G03090	AtVGT1	1	1	1
AT3G03270		1	1	1
AT3G03530	NPC4	1	1	1
AT3G03880		1	1	1
AT3G03890		1	1	1
AT3G04460	PEX12	1	1	1
AT3G04500		1	1	1
AT3G04630	WDL1	1	1	1
AT3G05400	SUGTL5	1	1	1
AT3G05545		1	1	1
AT3G05880	RCI2A	1	1	1
AT3G06210		1	1	1
AT3G06410		1	1	1
AT3G06420	ATG8H	1	1	1
AT3G06483	PDK	1	1	1
AT3G06500	INVC	1	1	1
AT3G06880		1	1	1
AT3G06930	PRMT13	1	1	1
AT3G07030		1	1	1
AT3G07100	ERMO2	1	1	1
AT3G07150		1	1	1
AT3G07310		1	1	1
AT3G07680		1	1	1
AT3G07980	MAP3KE2	1	1	1
AT3G08040	FRD3	1	1	1
AT3G08780		1	1	1
AT3G09250		1	1	1
AT3G09370	MYB3R-3	1	1	1
AT3G09480		1	1	1
AT3G09540		1	1	1
AT3G09710	IQD1	1	1	1
AT3G09850		1	1	1
AT3G10250		1	1	1
AT3G10570	CYP77A6	1	1	1
AT3G10915	RTNLB16	1	1	1
AT3G11530		1	1	1
AT3G11590		1	1	1
AT3G12050		1	1	1
AT3G12320	T2E22.34	1	1	1
AT3G12690	AGC1-5	1	1	1
AT3G13720	PRA1F3	1	1	1
AT3G14060		1	1	1
AT3G14067		1	1	1
AT3G14230	RAP2-2	1	1	1
AT3G14560		1	1	1
AT3G14590	NTMC2T6.2	1	1	1
AT3G15030	TCP4	1	1	1
AT3G15770		1	1	1
AT3G16060		1	1	1
AT3G16180	NPF1.1	1	1	1
AT3G16190		1	1	1
AT3G16500	IAA26	1	1	1
AT3G16520	UGT88A1	1	1	1
AT3G17000	UBC32	1	1	1
AT3G18040	MPK9	1	1	1
AT3G19580	AZF2	1	1	1
AT3G19950		1	1	1
AT3G20015	ASPG2	1	1	1
AT3G20160		1	1	1
AT3G20550	DDL	1	1	1
AT3G20940	CYP705A30	1	1	1
AT3G22104		1	1	1
AT3G22290		1	1	1
AT3G22400	LOX5	1	1	1
AT3G22590	CDC37	1	1	1
AT3G22760	TCX3	1	1	1
AT3G22790	NET1A	1	1	1
AT3G22930	CML11	1	1	1
AT3G23430	PHO1	1	1	1
AT3G24340	CLSY4	1	1	1
AT3G24503	ALDH2C4	1	1	1
AT3G25560	NIK2	1	1	1
AT3G26100		1	1	1
AT3G26600	ARO4	1	1	1
AT3G27025		1	1	1
AT3G27160	GHS1	1	1	1
AT3G27190	UKL2	1	1	1
AT3G27300	ACG9	1	1	1
AT3G28050		1	1	1
AT3G29810	COBL3	1	1	1
AT3G33520	ARP6	1	1	1
AT3G43230		1	1	1
AT3G43700	BPM6	1	1	1
AT3G43790	ZIFL2	1	1	1
AT3G45530		1	1	1
AT3G47342		1	1	1
AT3G47380		1	1	1
AT3G47780	ABCA7	1	1	1
AT3G47940		1	1	1
AT3G48330	PIMT1	1	1	1
AT3G48450		1	1	1
AT3G48970		1	1	1
AT3G49070		1	1	1
AT3G49120	PER34	1	1	1
AT3G49220	PME34	1	1	1
AT3G49550		1	1	1
AT3G50300		1	1	1
AT3G50530	CRK5	1	1	1
AT3G50690		1	1	1
AT3G50740	UGT72E1	1	1	1
AT3G50890	ZHD7	1	1	1
AT3G51120		1	1	1
AT3G51130		1	1	1
AT3G52210		1	1	1
AT3G52680		1	1	1
AT3G53270		1	1	1
AT3G53530	NAKR3	1	1	1
AT3G53940		1	1	1
AT3G54000		1	1	1
AT3G54780		1	1	1
AT3G55410		1	1	1
AT3G55610	P5CSB	1	1	1
AT3G56250		1	1	1
AT3G56820		1	1	1
AT3G57160		1	1	1
AT3G57550	GK-2	1	1	1
AT3G57810		1	1	1
AT3G57870	SCE1	1	1	1
AT3G58460	RBL15	1	1	1
AT3G59220	PRN1	1	1	1
AT3G59280	TXR1	1	1	1
AT3G59580	NLP9	1	1	1
AT3G60130	BGLU16	1	1	1
AT3G60520		1	1	1
AT3G60910		1	1	1
AT3G61680		1	1	1
AT3G61890	ATHB-12	1	1	1
AT3G62160		1	1	1
AT3G62590		1	1	1
AT3G62840		1	1	1
AT4G00500		1	1	1
AT4G01026	PYL7	1	1	1
AT4G01850	SAM2	1	1	1
AT4G02070	MSH6	1	1	1
AT4G02380	SAG21	1	1	1
AT4G02700	SULTR3;2	1	1	1
AT4G02880		1	1	1
AT4G03030	OR23	1	1	1
AT4G03420		1	1	1
AT4G04330		1	1	1
AT4G04570	CRK40	1	1	1
AT4G04700	CPK27	1	1	1
AT4G06634		1	1	1
AT4G08160		1	1	1
AT4G09300		1	1	1
AT4G09990	GXM2	1	1	1
AT4G10150	ATL7	1	1	1
AT4G10320		1	1	1
AT4G10500		1	1	1
AT4G10770	OPT7	1	1	1
AT4G11050	AtGH9C3	1	1	1
AT4G11910	SGR2	1	1	1
AT4G12120	SEC1B	1	1	1
AT4G12900		1	1	1
AT4G13110		1	1	1
AT4G13195	CLE44	1	1	1
AT4G13510	AMT1-1	1	1	1
AT4G13850	RBG2	1	1	1
AT4G14150	KIN12A	1	1	1
AT4G14650		1	1	1
AT4G14890	FdC2	1	1	1
AT4G15230	ABCG30	1	1	1
AT4G15450		1	1	1
AT4G16340	SPK1	1	1	1
AT4G16500	CYS4	1	1	1
AT4G16650		1	1	1
AT4G16745		1	1	1
AT4G16990	RLM3	1	1	1
AT4G17040	CLPR4	1	1	1
AT4G17100		1	1	1
AT4G17250		1	1	1
AT4G17610		1	1	1
AT4G17680		1	1	1
AT4G17830		1	1	1
AT4G18640	MRH1	1	1	1
AT4G18750	DOT4	1	1	1
AT4G18800	RABA1D	1	1	1
AT4G18890	BEH3	1	1	1
AT4G19150		1	1	1
AT4G19185		1	1	1
AT4G19430		1	1	1
AT4G19640	RABF2B	1	1	1
AT4G19645		1	1	1
AT4G19700	BOI	1	1	1
AT4G20320		1	1	1
AT4G20840		1	1	1
AT4G20870	FAH2	1	1	1
AT4G21192		1	1	1
AT4G21326	ATSBT3.12	1	1	1
AT4G21380	SD18	1	1	1
AT4G21580		1	1	1
AT4G22240	PAP2	1	1	1
AT4G23640	POT3	1	1	1
AT4G23680		1	1	1
AT4G23700	CHX17	1	1	1
AT4G23760		1	1	1
AT4G23790	TBL24	1	1	1
AT4G24190	SHD	1	1	1
AT4G25090	RBOHG	1	1	1
AT4G25340	FKBP53	1	1	1
AT4G25990	CIL	1	1	1
AT4G26640	WRKY20	1	1	1
AT4G27270		1	1	1
AT4G27410	NAC072	1	1	1
AT4G27830	BGLU10	1	1	1
AT4G27860	MEB1	1	1	1
AT4G28710	XI-H	1	1	1
AT4G28730	GRXC5	1	1	1
AT4G28790	BHLH23	1	1	1
AT4G29820	CFIS1	1	1	1
AT4G29960		1	1	1
AT4G30240		1	1	1
AT4G30420		1	1	1
AT4G30550		1	1	1
AT4G30790		1	1	1
AT4G31330		1	1	1
AT4G32000		1	1	1
AT4G32050		1	1	1
AT4G32070	Phox4	1	1	1
AT4G32660	AFC3	1	1	1
AT4G33030	SQD1	1	1	1
AT4G33070	PDC1	1	1	1
AT4G33625		1	1	1
AT4G33945		1	1	1
AT4G34050	CCOAOMT1	1	1	1
AT4G34480		1	1	1
AT4G34670	RPS3AB	1	1	1
AT4G34920		1	1	1
AT4G34950		1	1	1
AT4G34960	CYP21-1	1	1	1
AT4G35000	APX3	1	1	1
AT4G35030		1	1	1
AT4G35240		1	1	1
AT4G36648		1	1	1
AT4G36870	BLH2	1	1	1
AT4G37180		1	1	1
AT4G37640	ACA2	1	1	1
AT4G38020		1	1	1
AT4G38350		1	1	1
AT4G38980		1	1	1
AT4G39280		1	1	1
AT4G39420		1	1	1
AT4G39860		1	1	1
AT4G39940	APK2	1	1	1
AT4G40070	ATL32	1	1	1
AT5G01380	GT-3A	1	1	1
AT5G01520		1	1	1
AT5G01780		1	1	1
AT5G01890	PXC2	1	1	1
AT5G02260	EXPA9	1	1	1
AT5G02890		1	1	1
AT5G03070	IMPA9	1	1	1
AT5G03870		1	1	1
AT5G03900		1	1	1
AT5G04250		1	1	1
AT5G04760		1	1	1
AT5G05220		1	1	1
AT5G06530	ABCG22	1	1	1
AT5G06590		1	1	1
AT5G06940		1	1	1
AT5G07000	SOT14	1	1	1
AT5G07280	EMS1	1	1	1
AT5G07322		1	1	1
AT5G07710	NEN1	1	1	1
AT5G07790		1	1	1
AT5G08020	RPA1B	1	1	1
AT5G08190	NF-YB12	1	1	1
AT5G08370	AGAL2	1	1	1
AT5G10270	CDKC-1	1	1	1
AT5G10410		1	1	1
AT5G10650		1	1	1
AT5G10960	CAF1-10	1	1	1
AT5G11060	KNAT4	1	1	1
AT5G11090		1	1	1
AT5G11100	SYT4	1	1	1
AT5G11860	SSP5	1	1	1
AT5G13070		1	1	1
AT5G13080	WRKY75	1	1	1
AT5G13140		1	1	1
AT5G13550	SULTR4;1	1	1	1
AT5G13570	DCP2	1	1	1
AT5G13760		1	1	1
AT5G14210		1	1	1
AT5G14420	RGLG2	1	1	1
AT5G14520		1	1	1
AT5G14840		1	1	1
AT5G15850	COL1	1	1	1
AT5G16010		1	1	1
AT5G16280		1	1	1
AT5G16830	SYP21	1	1	1
AT5G17280		1	1	1
AT5G17710	EMB1241	1	1	1
AT5G17760		1	1	1
AT5G17850	CCX2	1	1	1
AT5G18010	SAUR19	1	1	1
AT5G18130		1	1	1
AT5G18270	ANAC087	1	1	1
AT5G18340	PUB48	1	1	1
AT5G18420		1	1	1
AT5G18850		1	1	1
AT5G18930	SAMDC4	1	1	1
AT5G19320	RANGAP2	1	1	1
AT5G19860		1	1	1
AT5G19940	PAP8	1	1	1
AT5G19980	GONST4	1	1	1
AT5G20830	SUS1	1	1	1
AT5G21990	OEP61	1	1	1
AT5G22730		1	1	1
AT5G22740	CSLA2	1	1	1
AT5G22770	ALPHA-ADR	1	1	1
AT5G22880	H2B	1	1	1
AT5G23575		1	1	1
AT5G25280		1	1	1
AT5G25580		1	1	1
AT5G25810	TINY	1	1	1
AT5G26710		1	1	1
AT5G27395		1	1	1
AT5G27990		1	1	1
AT5G28540	MED37A	1	1	1
AT5G28840	GME	1	1	1
AT5G29000	PHL1	1	1	1
AT5G33290	XGD1	1	1	1
AT5G35080	OS9	1	1	1
AT5G35370		1	1	1
AT5G36930		1	1	1
AT5G37000		1	1	1
AT5G37010		1	1	1
AT5G37180	SUS5	1	1	1
AT5G37340		1	1	1
AT5G37690		1	1	1
AT5G38010	UGT76E9	1	1	1
AT5G38710	POX2	1	1	1
AT5G40780	LHT1	1	1	1
AT5G40880	ZFWD3	1	1	1
AT5G40960		1	1	1
AT5G41790	CIP1	1	1	1
AT5G42630	KAN4	1	1	1
AT5G43300	GDPD3	1	1	1
AT5G43450		1	1	1
AT5G43745		1	1	1
AT5G45070	PP2A8	1	1	1
AT5G45260	RRS1	1	1	1
AT5G45660		1	1	1
AT5G45800	MEE62	1	1	1
AT5G46340		1	1	1
AT5G47430		1	1	1
AT5G47920		1	1	1
AT5G48310		1	1	1
AT5G49370		1	1	1
AT5G49460	ACLB-2	1	1	1
AT5G49690	UGT91C1	1	1	1
AT5G49800		1	1	1
AT5G50230		1	1	1
AT5G50340		1	1	1
AT5G51730		1	1	1
AT5G52050		1	1	1
AT5G52250	RUP1	1	1	1
AT5G52320	CYP96A4	1	1	1
AT5G52450		1	1	1
AT5G52570	BETA-OHASE 2	1	1	1
AT5G52860	ABCG8	1	1	1
AT5G52890		1	1	1
AT5G52900	MAKR6	1	1	1
AT5G53400	BOB1	1	1	1
AT5G53440		1	1	1
AT5G53450	PAP14	1	1	1
AT5G53970		1	1	1
AT5G54040		1	1	1
AT5G54100		1	1	1
AT5G54130		1	1	1
AT5G54300		1	1	1
AT5G54670	ATK3	1	1	1
AT5G54860		1	1	1
AT5G55100		1	1	1
AT5G55480	GDPDL4	1	1	1
AT5G55850	NOI	1	1	1
AT5G55970		1	1	1
AT5G56320	EXPA14	1	1	1
AT5G57140	PAP28	1	1	1
AT5G57540	XTH13	1	1	1
AT5G57660	COL5	1	1	1
AT5G57900	SKIP1	1	1	1
AT5G58150		1	1	1
AT5G58770		1	1	1
AT5G58860	CYP86A1	1	1	1
AT5G59140		1	1	1
AT5G60360	ALEU	1	1	1
AT5G60520		1	1	1
AT5G60720		1	1	1
AT5G60790	ABCF1	1	1	1
AT5G61000	RPA1D	1	1	1
AT5G61570		1	1	1
AT5G61980	AGD1	1	1	1
AT5G62340		1	1	1
AT5G62460		1	1	1
AT5G62480	GSTU9	1	1	1
AT5G62520	SRO5	1	1	1
AT5G63140	PAP29	1	1	1
AT5G63800	BGAL6	1	1	1
AT5G63990	SAL3	1	1	1
AT5G64150		1	1	1
AT5G64330	RPT3	1	1	1
AT5G64430		1	1	1
AT5G64520	XRCC2	1	1	1
AT5G65670	IAA9	1	1	1
AT5G65700	BAM1	1	1	1
AT5G65870	PSK5	1	1	1
AT5G66330		1	1	1
AT5G66620	DAR6	1	1	1
AT5G66770	SCL4	1	1	1
AT5G66985		1	1	1
AT5G67460		1	1	1
AT5G67488		1	1	1
AT5G67540		1	1	1
AT5G67640		1	1	1
AT1G02020		1	1	0
AT1G02980	CUL2	1	1	0
AT1G04110	SBT1.2	1	1	0
AT1G04650		1	1	0
AT1G04960		1	1	0
AT1G04980	PDIL2-2	1	1	0
AT1G05570	CALS1	1	1	0
AT1G05820	SPPL5	1	1	0
AT1G05835		1	1	0
AT1G05860		1	1	0
AT1G06070		1	1	0
AT1G06090		1	1	0
AT1G06470		1	1	0
AT1G06670	NIH	1	1	0
AT1G06790		1	1	0
AT1G07180	NDA1	1	1	0
AT1G07350	SR45A	1	1	0
AT1G07530	SCL14	1	1	0
AT1G07870		1	1	0
AT1G08300	NVL	1	1	0
AT1G08580		1	1	0
AT1G08840	emb2411	1	1	0
AT1G08880	HTA5	1	1	0
AT1G08920	SUGTL2	1	1	0
AT1G09450		1	1	0
AT1G09830	PUR2	1	1	0
AT1G10240	FRS11	1	1	0
AT1G10930	RECQL4A	1	1	0
AT1G11130	SUB	1	1	0
AT1G11960		1	1	0
AT1G12550	HPR3	1	1	0
AT1G12680	PEPKR2	1	1	0
AT1G13110	CYP71B7	1	1	0
AT1G13670		1	1	0
AT1G13880		1	1	0
AT1G14140	PUMP3	1	1	0
AT1G14670	TMN2	1	1	0
AT1G14910		1	1	0
AT1G15440	PWP2	1	1	0
AT1G15490		1	1	0
AT1G15550	GA3OX1	1	1	0
AT1G16130	WAKL2	1	1	0
AT1G17130		1	1	0
AT1G17140	ICR1	1	1	0
AT1G17750	PEPR2	1	1	0
AT1G17920	HDG12	1	1	0
AT1G18030		1	1	0
AT1G18150	MPK8	1	1	0
AT1G18260	HRD3A	1	1	0
AT1G18485	PCMP-H8	1	1	0
AT1G18500	IPMS1	1	1	0
AT1G18840	IQD30	1	1	0
AT1G19110		1	1	0
AT1G19240		1	1	0
AT1G19610	PDF1.4	1	1	0
AT1G20060		1	1	0
AT1G20225		1	1	0
AT1G20510	4CLL5	1	1	0
AT1G21480		1	1	0
AT1G21640	NADK2	1	1	0
AT1G21900		1	1	0
AT1G22230		1	1	0
AT1G22470		1	1	0
AT1G23780	SKIP22	1	1	0
AT1G24240		1	1	0
AT1G24265		1	1	0
AT1G24625	ZFP7	1	1	0
AT1G25480	ALMT4	1	1	0
AT1G26330		1	1	0
AT1G26840	ORC6	1	1	0
AT1G27090		1	1	0
AT1G27400	RPL17A	1	1	0
AT1G27500		1	1	0
AT1G29970	RPL18AA	1	1	0
AT1G30810	JMJ18	1	1	0
AT1G30900	VSR6	1	1	0
AT1G32090		1	1	0
AT1G32330	HSFA1D	1	1	0
AT1G32790	CID11	1	1	0
AT1G33055		1	1	0
AT1G33420		1	1	0
AT1G33780		1	1	0
AT1G33800	GXM3	1	1	0
AT1G34220		1	1	0
AT1G34330		1	1	0
AT1G34640		1	1	0
AT1G44110	CYCA1-1	1	1	0
AT1G44770		1	1	0
AT1G44900	MCM2	1	1	0
AT1G45015		1	1	0
AT1G47210	CYCA3-2	1	1	0
AT1G47310		1	1	0
AT1G48140		1	1	0
AT1G48300		1	1	0
AT1G48720		1	1	0
AT1G48770		1	1	0
AT1G49320	ATUSPL1	1	1	0
AT1G49580	CRK8	1	1	0
AT1G49820	MTK	1	1	0
AT1G51560		1	1	0
AT1G52150	ATHB-15	1	1	0
AT1G52420		1	1	0
AT1G53040		1	1	0
AT1G53280	DJ1B	1	1	0
AT1G53730	SRF6	1	1	0
AT1G54030	MVP1	1	1	0
AT1G54150		1	1	0
AT1G54370	NHX5	1	1	0
AT1G54380		1	1	0
AT1G54920		1	1	0
AT1G55090	T7N22.4	1	1	0
AT1G55110	IDD7	1	1	0
AT1G55180	PLDEPSILON	1	1	0
AT1G55310	SCL33	1	1	0
AT1G55340		1	1	0
AT1G55680		1	1	0
AT1G55850	CSLE1	1	1	0
AT1G56140		1	1	0
AT1G56200	emb1303	1	1	0
AT1G56460		1	1	0
AT1G57610		1	1	0
AT1G58130		1	1	0
AT1G58210	EMB1674	1	1	0
AT1G59850		1	1	0
AT1G59870	ABCG36	1	1	0
AT1G60995		1	1	0
AT1G61250	SCAMP3	1	1	0
AT1G61360		1	1	0
AT1G61900		1	1	0
AT1G62730		1	1	0
AT1G63470	AHL5	1	1	0
AT1G64790	ILA	1	1	0
AT1G64890		1	1	0
AT1G66730	AtLIG6	1	1	0
AT1G67060		1	1	0
AT1G67110	CYP735A2	1	1	0
AT1G67140	SWEETIE	1	1	0
AT1G67300		1	1	0
AT1G67400		1	1	0
AT1G68490		1	1	0
AT1G70140	FH8	1	1	0
AT1G70160		1	1	0
AT1G71400	RLP12	1	1	0
AT1G71730		1	1	0
AT1G71750	HGPT	1	1	0
AT1G72190		1	1	0
AT1G72880		1	1	0
AT1G73160		1	1	0
AT1G73380		1	1	0
AT1G75510		1	1	0
AT1G76390	PUB43	1	1	0
AT1G77122		1	1	0
AT1G77440	PBC2	1	1	0
AT1G77510	PDIL1-2	1	1	0
AT1G77520		1	1	0
AT1G77920	TGA7	1	1	0
AT1G78210		1	1	0
AT1G78490	CYP708A3	1	1	0
AT1G78930		1	1	0
AT1G79790		1	1	0
AT1G79990		1	1	0
AT1G80080	TMM	1	1	0
AT1G80400		1	1	0
AT1G80640		1	1	0
AT2G01220		1	1	0
AT2G01850	XTH27	1	1	0
AT2G01870		1	1	0
AT2G02590		1	1	0
AT2G03350		1	1	0
AT2G03730	ACR5	1	1	0
AT2G03800	GEK1	1	1	0
AT2G03810		1	1	0
AT2G03820		1	1	0
AT2G03980		1	1	0
AT2G05620	PGR5	1	1	0
AT2G05765		1	1	0
AT2G07680	ATMRP11	1	1	0
AT2G12462		1	1	0
AT2G13610	ABCG5	1	1	0
AT2G14460		1	1	0
AT2G14750	APK1	1	1	0
AT2G14910		1	1	0
AT2G15430	NRPB3	1	1	0
AT2G16530		1	1	0
AT2G16790		1	1	0
AT2G17200	DSK2B	1	1	0
AT2G17410	ARID3	1	1	0
AT2G17580		1	1	0
AT2G17970		1	1	0
AT2G18193		1	1	0
AT2G18570	UGT72D1	1	1	0
AT2G18770		1	1	0
AT2G18840		1	1	0
AT2G19130		1	1	0
AT2G19340		1	1	0
AT2G19620	NDL3	1	1	0
AT2G20410		1	1	0
AT2G20580	RPN1A	1	1	0
AT2G21080		1	1	0
AT2G22480	PFK5	1	1	0
AT2G22770	NAI1	1	1	0
AT2G22970	SCPL11	1	1	0
AT2G23310	RER1C	1	1	0
AT2G23630	sks16	1	1	0
AT2G23740	SUVR5	1	1	0
AT2G25000	WRKY60	1	1	0
AT2G25060	ENODL14	1	1	0
AT2G25260		1	1	0
AT2G26500		1	1	0
AT2G26570	WEB1	1	1	0
AT2G26800	HMGCL	1	1	0
AT2G27260		1	1	0
AT2G27580	SAP3	1	1	0
AT2G27790		1	1	0
AT2G28110	IRX7	1	1	0
AT2G28400		1	1	0
AT2G28620		1	1	0
AT2G28990		1	1	0
AT2G29300		1	1	0
AT2G29460	GSTU4	1	1	0
AT2G29690	ASA2	1	1	0
AT2G30320		1	1	0
AT2G30550		1	1	0
AT2G31260	APG9	1	1	0
AT2G31900	XI-F	1	1	0
AT2G32590	CAPH	1	1	0
AT2G32910		1	1	0
AT2G33380	PXG3	1	1	0
AT2G33740	CUTA	1	1	0
AT2G34090	MEE18	1	1	0
AT2G34150	SCAR1	1	1	0
AT2G34710	ATHB-14	1	1	0
AT2G34750		1	1	0
AT2G36305	FACE2	1	1	0
AT2G36380	ABCG34	1	1	0
AT2G36950		1	1	0
AT2G36970	UGT86A1	1	1	0
AT2G37360	ABCG2	1	1	0
AT2G37470		1	1	0
AT2G38695		1	1	0
AT2G38770	EMB2765	1	1	0
AT2G38840		1	1	0
AT2G39220	PLP6	1	1	0
AT2G39760	BPM3	1	1	0
AT2G41130	BHLH106	1	1	0
AT2G41970		1	1	0
AT2G42270		1	1	0
AT2G42590	GRF9	1	1	0
AT2G42720		1	1	0
AT2G42760		1	1	0
AT2G43240		1	1	0
AT2G43980	ITPK4	1	1	0
AT2G44510		1	1	0
AT2G45290	TKL-2	1	1	0
AT2G45330	emb1067	1	1	0
AT2G46535		1	1	0
AT2G47180	GOLS1	1	1	0
AT2G47330	RH24	1	1	0
AT2G47800	ABCC4	1	1	0
AT2G47990	SWA1	1	1	0
AT3G01100	HYP1	1	1	0
AT3G01560		1	1	0
AT3G02850	SKOR	1	1	0
AT3G02900		1	1	0
AT3G03680		1	1	0
AT3G03750	SUVR3	1	1	0
AT3G03855		1	1	0
AT3G04020		1	1	0
AT3G04605		1	1	0
AT3G04610	FLK	1	1	0
AT3G05330	TAN	1	1	0
AT3G05530	RPT5A	1	1	0
AT3G05650	AtRLP32	1	1	0
AT3G05850		1	1	0
AT3G05940		1	1	0
AT3G06400	CHR11	1	1	0
AT3G06840		1	1	0
AT3G07070		1	1	0
AT3G07350		1	1	0
AT3G07700		1	1	0
AT3G07990	SCPL27	1	1	0
AT3G09410	PAE5	1	1	0
AT3G10050	OMR1	1	1	0
AT3G10200		1	1	0
AT3G10330	TFIIB2	1	1	0
AT3G11320		1	1	0
AT3G12870		1	1	0
AT3G13530	M3KE1	1	1	0
AT3G13980		1	1	0
AT3G14800		1	1	0
AT3G15530		1	1	0
AT3G15850	ADS3	1	1	0
AT3G16050	PDX12	1	1	0
AT3G16350		1	1	0
AT3G16660		1	1	0
AT3G17410		1	1	0
AT3G18100	MYB4R1	1	1	0
AT3G18773	ATL77	1	1	0
AT3G18940		1	1	0
AT3G19590	BUB3.1	1	1	0
AT3G19620	BXL5	1	1	0
AT3G19720	ARC5	1	1	0
AT3G20150		1	1	0
AT3G21160	MNS2	1	1	0
AT3G21865	PEX22	1	1	0
AT3G22740	HMT3	1	1	0
AT3G23280	XBAT35	1	1	0
AT3G24040		1	1	0
AT3G25600	CML16	1	1	0
AT3G26510		1	1	0
AT3G27220		1	1	0
AT3G27700		1	1	0
AT3G27880		1	1	0
AT3G29010		1	1	0
AT3G29090	PME31	1	1	0
AT3G29270		1	1	0
AT3G29320	PHS1	1	1	0
AT3G29575	AFP3	1	1	0
AT3G42150		1	1	0
AT3G44380		1	1	0
AT3G45090		1	1	0
AT3G45650	NPF2.7	1	1	0
AT3G47290	PLC8	1	1	0
AT3G47300	SELT	1	1	0
AT3G47820	PUB39	1	1	0
AT3G48190	ATM	1	1	0
AT3G48720		1	1	0
AT3G49190		1	1	0
AT3G50210		1	1	0
AT3G50240	KICP-02	1	1	0
AT3G50380		1	1	0
AT3G50970	XERO2	1	1	0
AT3G51280		1	1	0
AT3G51450	SSL7	1	1	0
AT3G52850	VSR1	1	1	0
AT3G53230	CDC48D	1	1	0
AT3G53520	UXS1	1	1	0
AT3G53740	RPL36B	1	1	0
AT3G54360		1	1	0
AT3G54380		1	1	0
AT3G54610	HAG1	1	1	0
AT3G54826		1	1	0
AT3G54840	RABF1	1	1	0
AT3G54850	PUB14	1	1	0
AT3G54870	MRH2	1	1	0
AT3G55010	PUR5	1	1	0
AT3G55020		1	1	0
AT3G55090	ABCG16	1	1	0
AT3G55990	ESK1	1	1	0
AT3G57330	ACA11	1	1	0
AT3G57650	LPAT2	1	1	0
AT3G59360	UTR6	1	1	0
AT3G59480		1	1	0
AT3G61160	ASK2	1	1	0
AT3G61490		1	1	0
AT3G61550	ATL68	1	1	0
AT3G61760	DRP1B	1	1	0
AT3G62730		1	1	0
AT3G63000	NPL41	1	1	0
AT3G63300	FKD1	1	1	0
AT3G63450		1	1	0
AT3G63460	SEC31B	1	1	0
AT3G63470	SCPL40	1	1	0
AT4G00230	SBT4.14	1	1	0
AT4G01360		1	1	0
AT4G01810		1	1	0
AT4G02230	RPL19C	1	1	0
AT4G03010		1	1	0
AT4G03090		1	1	0
AT4G03120		1	1	0
AT4G03410		1	1	0
AT4G04040	PFP-BETA2	1	1	0
AT4G05000	VPS28-2	1	1	0
AT4G05520	EHD2	1	1	0
AT4G08320	TPR8	1	1	0
AT4G08580		1	1	0
AT4G09020	ISA3	1	1	0
AT4G09510	CINV2	1	1	0
AT4G10070		1	1	0
AT4G10590	UBP9	1	1	0
AT4G11220	RTNLB2	1	1	0
AT4G12520		1	1	0
AT4G12550	AIR1	1	1	0
AT4G12910	SCPL20	1	1	0
AT4G13370		1	1	0
AT4G13575		1	1	0
AT4G13730		1	1	0
AT4G14330		1	1	0
AT4G14580	CIPK4	1	1	0
AT4G15765		1	1	0
AT4G16566	HINT4	1	1	0
AT4G17410		1	1	0
AT4G17840		1	1	0
AT4G17890	AGD8	1	1	0
AT4G18120	AML3	1	1	0
AT4G18240	SS4	1	1	0
AT4G18830	OFP5	1	1	0
AT4G20230	TPS09	1	1	0
AT4G21110		1	1	0
AT4G21710	NRPB2	1	1	0
AT4G21790	TOM1	1	1	0
AT4G22130	SRF8	1	1	0
AT4G23000		1	1	0
AT4G23270	CRK19	1	1	0
AT4G23530		1	1	0
AT4G24590		1	1	0
AT4G26660		1	1	0
AT4G28080		1	1	0
AT4G28940		1	1	0
AT4G29070		1	1	0
AT4G30210	ATR2	1	1	0
AT4G30390		1	1	0
AT4G30460		1	1	0
AT4G30470		1	1	0
AT4G30570		1	1	0
AT4G30780		1	1	0
AT4G30980	BHLH69	1	1	0
AT4G31500	CYP83B1	1	1	0
AT4G31590	CSLC5	1	1	0
AT4G32250		1	1	0
AT4G32290		1	1	0
AT4G32390		1	1	0
AT4G32640		1	1	0
AT4G32700	TEB	1	1	0
AT4G32930		1	1	0
AT4G33630	EX1	1	1	0
AT4G34340	TAF8	1	1	0
AT4G34370	ARI1	1	1	0
AT4G34412		1	1	0
AT4G35100	PIP2-7	1	1	0
AT4G35220		1	1	0
AT4G35310	CPK5	1	1	0
AT4G35490	MRPL11	1	1	0
AT4G35630	PSAT1	1	1	0
AT4G35830	ACO1	1	1	0
AT4G35985		1	1	0
AT4G36500		1	1	0
AT4G37080		1	1	0
AT4G37430	CYP81F1	1	1	0
AT4G37700		1	1	0
AT4G38910	BPC5	1	1	0
AT4G39150		1	1	0
AT4G39230		1	1	0
AT4G39990	RABA4B	1	1	0
AT5G01180	NPF8.2	1	1	0
AT5G01370	ACI1	1	1	0
AT5G01930	MAN6	1	1	0
AT5G02530	ALY2	1	1	0
AT5G02620	ANK1	1	1	0
AT5G03260	LAC11	1	1	0
AT5G03560		1	1	0
AT5G03690		1	1	0
AT5G03770	KDTA	1	1	0
AT5G04020		1	1	0
AT5G04530	KCS21	1	1	0
AT5G04540	MTM2	1	1	0
AT5G04910		1	1	0
AT5G04950	NAS1	1	1	0
AT5G05520		1	1	0
AT5G05790		1	1	0
AT5G05830		1	1	0
AT5G05987	PRA1A2	1	1	0
AT5G06270		1	1	0
AT5G06990		1	1	0
AT5G07340		1	1	0
AT5G07660	SMC6A	1	1	0
AT5G07810		1	1	0
AT5G08580		1	1	0
AT5G09680	RLF	1	1	0
AT5G10390	HTR2	1	1	0
AT5G10946		1	1	0
AT5G12170	CLT3	1	1	0
AT5G12400		1	1	0
AT5G12920		1	1	0
AT5G13700	PAO1	1	1	0
AT5G13970		1	1	0
AT5G14100	ABCI11	1	1	0
AT5G14700		1	1	0
AT5G14720		1	1	0
AT5G15390		1	1	0
AT5G16250		1	1	0
AT5G17360		1	1	0
AT5G18860		1	1	0
AT5G19260	FAF3	1	1	0
AT5G19480	MED19B	1	1	0
AT5G19550	ASP2	1	1	0
AT5G20540	BRXL4	1	1	0
AT5G20960	AAO1	1	1	0
AT5G21280		1	1	0
AT5G22070		1	1	0
AT5G22130	PIGM	1	1	0
AT5G23510		1	1	0
AT5G25370	PLDZETA	1	1	0
AT5G28640	GIF1	1	1	0
AT5G30490		1	1	0
AT5G33280	CBSCLC6	1	1	0
AT5G37480		1	1	0
AT5G38720		1	1	0
AT5G38895		1	1	0
AT5G39410		1	1	0
AT5G40250	ATL46	1	1	0
AT5G42750	BKI1	1	1	0
AT5G44080		1	1	0
AT5G44710		1	1	0
AT5G44860		1	1	0
AT5G47230	ERF5	1	1	0
AT5G47590		1	1	0
AT5G47690		1	1	0
AT5G48020		1	1	0
AT5G48450	sks3	1	1	0
AT5G48600	SMC4	1	1	0
AT5G48657		1	1	0
AT5G49560		1	1	0
AT5G49760		1	1	0
AT5G50960	NBP35	1	1	0
AT5G51170		1	1	0
AT5G51370		1	1	0
AT5G51410		1	1	0
AT5G51545	LPA2	1	1	0
AT5G51590	AHL4	1	1	0
AT5G51600	MAP65-3	1	1	0
AT5G51880		1	1	0
AT5G52910	ATIM	1	1	0
AT5G52950		1	1	0
AT5G53110		1	1	0
AT5G53300	UBC10	1	1	0
AT5G53650		1	1	0
AT5G53990	UGT79B9	1	1	0
AT5G54940		1	1	0
AT5G55340	AT5	1	1	0
AT5G55896		1	1	0
AT5G56530		1	1	0
AT5G56740	HAG2	1	1	0
AT5G57170		1	1	0
AT5G57330		1	1	0
AT5G57700		1	1	0
AT5G57860		1	1	0
AT5G58070	ATTIL	1	1	0
AT5G58710	CYP20-1	1	1	0
AT5G58900		1	1	0
AT5G59350		1	1	0
AT5G60200	DOF5.3	1	1	0
AT5G60980		1	1	0
AT5G61950		1	1	0
AT5G62410	SMC2-1	1	1	0
AT5G62550		1	1	0
AT5G62740	HIR1	1	1	0
AT5G63950	CHR24	1	1	0
AT5G64220	CMTA2	1	1	0
AT5G64660	PUB27	1	1	0
AT5G64710		1	1	0
AT5G65170		1	1	0
AT5G65490		1	1	0
AT5G65880		1	1	0
AT5G66390	PER72	1	1	0
AT5G66440		1	1	0
AT5G66930		1	1	0
AT5G67290		1	1	0
AT1G01020	ARV1	1	0	1
AT1G01140	CIPK9	1	0	1
AT1G01370	HTR12	1	0	1
AT1G02000	GAE2	1	0	1
AT1G02560	CLPP5	1	0	1
AT1G03860	PHB2	1	0	1
AT1G04680		1	0	1
AT1G06890		1	0	1
AT1G07400	HSP17.8	1	0	1
AT1G08130	LIG1	1	0	1
AT1G08210		1	0	1
AT1G10150	PP2A10	1	0	1
AT1G10510	emb2004	1	0	1
AT1G10970	ZIP4	1	0	1
AT1G11050		1	0	1
AT1G11680	CYP51G1	1	0	1
AT1G13170	ORP1D	1	0	1
AT1G13210	ALA11	1	0	1
AT1G14400	UBC1	1	0	1
AT1G16190	RAD23A	1	0	1
AT1G16310	MTP10	1	0	1
AT1G16320		1	0	1
AT1G16740		1	0	1
AT1G17270		1	0	1
AT1G17410		1	0	1
AT1G18265		1	0	1
AT1G19715	JAL3	1	0	1
AT1G19960		1	0	1
AT1G20220		1	0	1
AT1G20450	ERD10	1	0	1
AT1G20880		1	0	1
AT1G21810	FPP2	1	0	1
AT1G22040		1	0	1
AT1G22065		1	0	1
AT1G22070	TGA3	1	0	1
AT1G22440		1	0	1
AT1G22590	AGL87	1	0	1
AT1G22900	DIR11	1	0	1
AT1G22960		1	0	1
AT1G26340	CB5-A	1	0	1
AT1G26670	VTI12	1	0	1
AT1G28660		1	0	1
AT1G30110	NUDT25	1	0	1
AT1G30200		1	0	1
AT1G30470		1	0	1
AT1G31220	PUR3	1	0	1
AT1G31920	PCMP-H11	1	0	1
AT1G32230	RCD1	1	0	1
AT1G32400	TOM2A	1	0	1
AT1G32440	PKP3	1	0	1
AT1G32530	MIP1	1	0	1
AT1G32700		1	0	1
AT1G34340		1	0	1
AT1G35470		1	0	1
AT1G43650		1	0	1
AT1G44170	ALDH3H1	1	0	1
AT1G47278		1	0	1
AT1G47600	TGG4	1	0	1
AT1G48090		1	0	1
AT1G48230		1	0	1
AT1G49980		1	0	1
AT1G50240	TIO	1	0	1
AT1G51630		1	0	1
AT1G51680	4CL1	1	0	1
AT1G54890		1	0	1
AT1G55360		1	0	1
AT1G56150	SAUR71	1	0	1
AT1G58110		1	0	1
AT1G58230		1	0	1
AT1G59700	GSTU16	1	0	1
AT1G59970		1	0	1
AT1G62010		1	0	1
AT1G62280	SLAH1	1	0	1
AT1G62290	APA2	1	0	1
AT1G62380	ACO2	1	0	1
AT1G62510		1	0	1
AT1G62990	KNAT7	1	0	1
AT1G63640		1	0	1
AT1G65570		1	0	1
AT1G65580	FRA3	1	0	1
AT1G66820		1	0	1
AT1G67500	REV3	1	0	1
AT1G67690		1	0	1
AT1G68140		1	0	1
AT1G68470		1	0	1
AT1G68680		1	0	1
AT1G69420	PAT22	1	0	1
AT1G69690	TCP15	1	0	1
AT1G71350		1	0	1
AT1G72660	DRG2	1	0	1
AT1G73840	ESP1	1	0	1
AT1G74060	RPL6B	1	0	1
AT1G74310	CLPB1	1	0	1
AT1G74490		1	0	1
AT1G75020	LPAT4	1	0	1
AT1G75500	WAT1	1	0	1
AT1G75620		1	0	1
AT1G75750	GASA1	1	0	1
AT1G76690	OPR2	1	0	1
AT1G76940		1	0	1
AT1G77620		1	0	1
AT1G78230		1	0	1
AT1G79660		1	0	1
AT1G79970		1	0	1
AT1G80050	APT2	1	0	1
AT1G80380	GLYK	1	0	1
AT1G80530		1	0	1
AT1G80910		1	0	1
AT2G01010		1	0	1
AT2G01830	AHK4	1	0	1
AT2G02220	PSKR1	1	0	1
AT2G04240	XERICO	1	0	1
AT2G05590		1	0	1
AT2G07360		1	0	1
AT2G12646		1	0	1
AT2G13650	GONST1	1	0	1
AT2G16870		1	0	1
AT2G19090		1	0	1
AT2G19880		1	0	1
AT2G19920	RDR4	1	0	1
AT2G20770	GCL2	1	0	1
AT2G21050	LAX2	1	0	1
AT2G21100	DIR23	1	0	1
AT2G22795		1	0	1
AT2G23380	CLF	1	0	1
AT2G23700		1	0	1
AT2G24110		1	0	1
AT2G24290		1	0	1
AT2G25910		1	0	1
AT2G26000	BRIZ2	1	0	1
AT2G27130	XYP11	1	0	1
AT2G27200	LSG1-1	1	0	1
AT2G28410		1	0	1
AT2G28470	BGAL8	1	0	1
AT2G28510	DOF2.1	1	0	1
AT2G28570		1	0	1
AT2G29995	PSY3	1	0	1
AT2G30280	RDM4	1	0	1
AT2G31350	GLX2-5	1	0	1
AT2G32070	CAF1-7	1	0	1
AT2G32280		1	0	1
AT2G33310	IAA13	1	0	1
AT2G34080		1	0	1
AT2G36360		1	0	1
AT2G36420		1	0	1
AT2G36830	TIP1-1	1	0	1
AT2G36850	CALS10	1	0	1
AT2G37100		1	0	1
AT2G37300		1	0	1
AT2G39000		1	0	1
AT2G40060	CLC2	1	0	1
AT2G40110		1	0	1
AT2G40480		1	0	1
AT2G40620		1	0	1
AT2G40760	STR7	1	0	1
AT2G41020		1	0	1
AT2G42450		1	0	1
AT2G42680	MBF1A	1	0	1
AT2G44065		1	0	1
AT2G44580		1	0	1
AT2G46080		1	0	1
AT2G46390	SDH8	1	0	1
AT2G46560		1	0	1
AT2G46750	GULLO2	1	0	1
AT2G47370		1	0	1
AT3G01410		1	0	1
AT3G02540	RAD23C	1	0	1
AT3G03000	CML18	1	0	1
AT3G04060	anac046	1	0	1
AT3G04080	APY1	1	0	1
AT3G04350		1	0	1
AT3G04650		1	0	1
AT3G05160		1	0	1
AT3G05220		1	0	1
AT3G05670		1	0	1
AT3G06370	NHX3	1	0	1
AT3G06570		1	0	1
AT3G06620		1	0	1
AT3G07300		1	0	1
AT3G07950		1	0	1
AT3G08640		1	0	1
AT3G09220	LAC7	1	0	1
AT3G09270	GSTU8	1	0	1
AT3G09570		1	0	1
AT3G09880	B'BETA	1	0	1
AT3G10770		1	0	1
AT3G10800	BZIP28	1	0	1
AT3G11010	AtRLP34	1	0	1
AT3G11470		1	0	1
AT3G11550	CASP2	1	0	1
AT3G11964		1	0	1
AT3G12650		1	0	1
AT3G13550	COP10	1	0	1
AT3G14210	ESM1	1	0	1
AT3G14750	FLXL1	1	0	1
AT3G14940	PPC3	1	0	1
AT3G15340	PPI2	1	0	1
AT3G15660	GRXS15	1	0	1
AT3G16630	KINESIN-13A	1	0	1
AT3G16760		1	0	1
AT3G18820	RABG3F	1	0	1
AT3G20300		1	0	1
AT3G20540	POLIB	1	0	1
AT3G20870	ZTP29	1	0	1
AT3G22420	WNK2	1	0	1
AT3G22620		1	0	1
AT3G22910	ACA13	1	0	1
AT3G23050	IAA7	1	0	1
AT3G25100	CDC45	1	0	1
AT3G25610	ALA10	1	0	1
AT3G26170	CYP71B19	1	0	1
AT3G26380		1	0	1
AT3G26440		1	0	1
AT3G27020	YSL6	1	0	1
AT3G27230		1	0	1
AT3G27330		1	0	1
AT3G28210	SAP12	1	0	1
AT3G30122		1	0	1
AT3G44880	PAO	1	0	1
AT3G45980	H2B	1	0	1
AT3G47470	LHCA4	1	0	1
AT3G47610		1	0	1
AT3G49590		1	0	1
AT3G50070	CYCD3-3	1	0	1
AT3G50270		1	0	1
AT3G50560		1	0	1
AT3G50910		1	0	1
AT3G51420	SSL4	1	0	1
AT3G51480	GLR3.6	1	0	1
AT3G52115	GR1	1	0	1
AT3G53510	ABCG20	1	0	1
AT3G54670	TTN8	1	0	1
AT3G55150	ATEXO70H1	1	0	1
AT3G55560	AHL15	1	0	1
AT3G56570		1	0	1
AT3G56950	SIP2-1	1	0	1
AT3G57090	FIS1A	1	0	1
AT3G59000		1	0	1
AT3G59990	MAP2B	1	0	1
AT3G60280	UCC3	1	0	1
AT3G60310		1	0	1
AT3G61415	ASK21	1	0	1
AT3G62820		1	0	1
AT3G63280	NEK4	1	0	1
AT4G00090		1	0	1
AT4G00110	GAE3	1	0	1
AT4G00335	RHB1A	1	0	1
AT4G01037	WTF1	1	0	1
AT4G02430	SR34B	1	0	1
AT4G02500	XXT2	1	0	1
AT4G02570	CUL1	1	0	1
AT4G04692		1	0	1
AT4G05320	UBQ10	1	0	1
AT4G10060		1	0	1
AT4G12040	SAP7	1	0	1
AT4G14770	TCX2	1	0	1
AT4G15080	PAT19	1	0	1
AT4G15500	UGT84A4	1	0	1
AT4G17000		1	0	1
AT4G17440		1	0	1
AT4G17895	UBP20	1	0	1
AT4G18425		1	0	1
AT4G18570		1	0	1
AT4G18950		1	0	1
AT4G19390		1	0	1
AT4G20240	CYP71A27	1	0	1
AT4G20330		1	0	1
AT4G20410	GSNAP	1	0	1
AT4G20910	HEN1	1	0	1
AT4G21810	DER2.1	1	0	1
AT4G22140	EBS	1	0	1
AT4G22670	AtHip1	1	0	1
AT4G23493		1	0	1
AT4G24940	SAE1A	1	0	1
AT4G25810	XTH23	1	0	1
AT4G25960	ABCB2	1	0	1
AT4G27020		1	0	1
AT4G27460	CBSX5	1	0	1
AT4G28150		1	0	1
AT4G30480	TPR1	1	0	1
AT4G30710	QWRF8	1	0	1
AT4G30850	HHP2	1	0	1
AT4G30935	WRKY32	1	0	1
AT4G31350		1	0	1
AT4G32480		1	0	1
AT4G32551	LUG	1	0	1
AT4G33000	CBL10	1	0	1
AT4G33160	FBX13	1	0	1
AT4G33666		1	0	1
AT4G34100	SUD1	1	0	1
AT4G34220		1	0	1
AT4G34760		1	0	1
AT4G35260	IDH1	1	0	1
AT4G36180		1	0	1
AT4G36640		1	0	1
AT4G37190		1	0	1
AT4G38570	PIS2	1	0	1
AT5G01100		1	0	1
AT5G01300		1	0	1
AT5G02710		1	0	1
AT5G02910		1	0	1
AT5G04820	OFP13	1	0	1
AT5G05840		1	0	1
AT5G06140	SNX1	1	0	1
AT5G06210		1	0	1
AT5G07630		1	0	1
AT5G08660		1	0	1
AT5G10540	CYOP	1	0	1
AT5G11510	MYB3R-4	1	0	1
AT5G11630		1	0	1
AT5G13120	PNSL5	1	0	1
AT5G13840	FZR3	1	0	1
AT5G14020		1	0	1
AT5G14540		1	0	1
AT5G15570		1	0	1
AT5G16770	AtMYB9	1	0	1
AT5G17250		1	0	1
AT5G18980		1	0	1
AT5G19630		1	0	1
AT5G20060		1	0	1
AT5G20630	GER3	1	0	1
AT5G20990	CNX1	1	0	1
AT5G21930	PAA2	1	0	1
AT5G22060	ATJ2	1	0	1
AT5G23220	NIC3	1	0	1
AT5G23340		1	0	1
AT5G23900	RPL13D	1	0	1
AT5G24930	ATCOL4	1	0	1
AT5G25080		1	0	1
AT5G25830	GATA12	1	0	1
AT5G26570	GWD3	1	0	1
AT5G27330		1	0	1
AT5G27550		1	0	1
AT5G27630	ACBP5	1	0	1
AT5G37630	EMB2656	1	0	1
AT5G38300		1	0	1
AT5G39550	ORTH1	1	0	1
AT5G39980		1	0	1
AT5G40770	PHB3	1	0	1
AT5G42180	PER64	1	0	1
AT5G42970	CSN4	1	0	1
AT5G42980	TRX3	1	0	1
AT5G42990	UBC18	1	0	1
AT5G43370	PHT1-2	1	0	1
AT5G46530		1	0	1
AT5G48000	CYP708A2	1	0	1
AT5G48010	THAS1	1	0	1
AT5G48520		1	0	1
AT5G48570	FKBP65	1	0	1
AT5G51740		1	0	1
AT5G52882		1	0	1
AT5G53680		1	0	1
AT5G54165		1	0	1
AT5G54800	GPT1	1	0	1
AT5G54870		1	0	1
AT5G55520		1	0	1
AT5G56720		1	0	1
AT5G57110	ACA8	1	0	1
AT5G59845	GASA10	1	0	1
AT5G61660		1	0	1
AT5G62630	HIPL2	1	0	1
AT5G62910		1	0	1
AT5G63280		1	0	1
AT5G64860	DPE1	1	0	1
AT5G65160	TPR14	1	0	1
AT5G65300		1	0	1
AT5G65640	BHLH93	1	0	1
AT1G01160	GIF2	1	0	0
AT1G01170		1	0	0
AT1G01210		1	0	0
AT1G01300		1	0	0
AT1G01350		1	0	0
AT1G01390	UGT72B2	1	0	0
AT1G01490		1	0	0
AT1G01520	RVE3	1	0	0
AT1G01580	FRO2	1	0	0
AT1G01630		1	0	0
AT1G01750	ADF10	1	0	0
AT1G01800		1	0	0
AT1G01910		1	0	0
AT1G01930		1	0	0
AT1G01940	CYP18-1	1	0	0
AT1G02100		1	0	0
AT1G02120	VAD1	1	0	0
AT1G02140	MEE63	1	0	0
AT1G02170	AMC1	1	0	0
AT1G02270		1	0	0
AT1G02280	TOC33	1	0	0
AT1G02290		1	0	0
AT1G02330		1	0	0
AT1G02360		1	0	0
AT1G02390	GPAT2	1	0	0
AT1G02410	COX11	1	0	0
AT1G02680	TAF13	1	0	0
AT1G02690	IMPA6	1	0	0
AT1G02700		1	0	0
AT1G02720	GATL5	1	0	0
AT1G02730	CSLD5	1	0	0
AT1G02750	DI19-2	1	0	0
AT1G02800	CEL2	1	0	0
AT1G02840	SR34	1	0	0
AT1G02870		1	0	0
AT1G03060	SPI	1	0	0
AT1G03110	TRM82	1	0	0
AT1G03140		1	0	0
AT1G03150		1	0	0
AT1G03180		1	0	0
AT1G03190	UVH6	1	0	0
AT1G03260		1	0	0
AT1G03370		1	0	0
AT1G03420	Sadhu4-2	1	0	0
AT1G03760		1	0	0
AT1G03780	TPX2	1	0	0
AT1G03900	ATNAP4	1	0	0
AT1G03910	CTN	1	0	0
AT1G04020	BARD1	1	0	0
AT1G04030		1	0	0
AT1G04080	PRP39	1	0	0
AT1G04180	YUC9	1	0	0
AT1G04200		1	0	0
AT1G04340		1	0	0
AT1G04390		1	0	0
AT1G04400	CRY2	1	0	0
AT1G04420		1	0	0
AT1G04630	MEE4	1	0	0
AT1G04690	KAB1	1	0	0
AT1G04810	RPN2B	1	0	0
AT1G04830		1	0	0
[truncated: 16,178 more rows]
